# Supplementary material
Source: publisher figshare collection journal article supplement (https://geolsoc.figshare.com/ndownloader/files/5420717)
Supplement: Supplementary file 1 [file 5420717]

Hole 995A_Age (Ma)	Astrononian stelligerum	Astrononian umbilicatulum	Cassidulina carinata	Epistominella sp.	Epistominella exigua	Globocassidulina obtusa	Globocassidulina subglobosa	Melonis barleeanum	Pyrgo murrhina	Quadrimorphina laevigata	Stilostomella lepidula	Uvigerina peregrina	Uvigerina proboscidea
0.000	1.68	0.00	0.00	0.00	0.00	0.00	0.00	15.13	0.42	0.00	0.00	0.00	0.00
0.019	0.00	0.00	2.29	0.00	1.14	0.00	0.00	2.29	4.57	0.57	0.00	1.14	1.14
0.037	3.81	1.17	3.23	0.00	2.64	1.76	3.81	2.05	0.29	1.76	0.00	4.40	2.35
0.040	1.12	3.36	5.97	0.00	1.12	0.37	1.87	1.12	0.75	1.49	0.00	10.45	4.10
0.042	0.96	1.60	53.60	0.00	0.48	1.12	1.44	0.48	0.80	0.64	0.00	7.36	2.40
0.061	0.00	1.55	7.77	0.00	0.00	0.00	0.52	26.94	8.29	7.77	0.00	3.11	2.59
0.100	0.98	5.37	0.49	0.00	0.00	0.00	0.00	8.78	0.98	0.49	0.00	0.00	0.49
0.138	0.92	0.92	4.28	0.00	2.14	1.22	0.92	3.36	2.75	4.59	0.00	13.76	0.61
0.157	0.00	0.65	0.32	0.00	6.15	0.00	0.00	21.04	2.59	0.00	0.00	0.32	0.65
0.177	0.23	0.00	2.51	0.00	0.00	0.00	0.23	3.42	2.05	9.11	0.00	5.69	0.46
0.216	0.33	0.65	0.49	0.00	2.61	0.33	0.00	10.62	10.29	0.65	0.00	0.49	0.00
0.254	0.30	0.30	14.07	0.00	3.89	0.00	0.60	6.59	1.50	0.60	0.00	0.90	2.10
0.267	0.00	0.40	0.00	0.00	5.22	0.00	0.80	10.84	9.64	0.80	0.00	3.61	0.80
0.277	0.63	0.31	6.25	0.00	3.13	0.00	3.44	3.75	1.88	3.44	0.00	4.38	0.94
0.294	0.00	0.44	0.00	0.44	0.88	0.00	0.00	2.21	1.33	9.73	0.00	0.44	0.44
0.310	0.92	1.53	11.62	0.31	1.83	0.92	0.61	3.36	3.06	1.53	0.00	14.07	3.06
0.328	0.00	1.67	5.00	0.00	1.25	0.00	0.00	9.58	0.83	8.33	0.00	1.67	1.67
0.344	0.26	0.78	10.44	0.78	1.57	0.00	0.00	0.26	2.09	15.93	0.00	1.31	1.31
0.362	0.00	1.92	6.92	0.00	3.85	0.00	0.00	5.77	0.77	2.31	0.00	0.77	0.77
0.395	0.35	1.75	50.88	0.00	2.46	0.00	0.35	0.70	1.05	1.05	0.00	9.12	1.40
0.428	0.00	1.30	34.78	0.00	0.00	0.00	0.00	0.87	0.00	1.30	0.00	6.52	2.61
0.461	0.00	1.12	30.87	0.00	0.22	0.00	0.00	1.34	0.22	2.91	0.00	1.12	0.67
0.482	0.00	4.58	54.25	0.00	0.00	0.00	1.31	0.65	0.00	0.00	0.00	7.84	5.88
0.494	0.84	23.53	3.36	0.00	0.00	0.00	0.00	6.72	2.52	0.00	0.00	5.88	1.68
0.521	0.31	12.85	5.96	0.63	0.63	0.00	0.63	9.72	4.39	0.31	0.00	0.31	2.82
0.547	0.40	18.80	0.00	0.80	7.20	0.40	0.00	18.40	3.20	2.40	0.00	0.00	0.40
0.574	0.00	1.32	48.68	0.00	2.63	0.00	0.00	2.63	1.32	0.00	0.00	0.00	0.00
0.600	0.52	1.04	5.73	3.65	0.52	0.00	1.56	2.60	2.60	0.00	0.00	0.00	0.00
0.627	0.00	1.24	1.24	1.24	0.31	0.00	0.00	5.28	0.31	9.32	0.31	0.00	0.31
0.639	0.82	0.62	0.41	1.03	1.03	0.00	0.00	15.05	2.47	2.68	0.00	0.00	0.41
0.649	1.31	3.27	18.95	1.96	1.96	0.00	1.96	0.65	0.00	0.65	0.00	2.61	0.65
0.662	0.00	1.91	3.18	1.27	31.21	0.00	0.64	1.27	0.64	0.00	0.00	0.64	0.64
0.688	0.67	0.67	2.02	1.68	21.89	0.34	0.00	0.67	1.35	5.39	0.00	0.34	0.00
0.701	1.27	1.27	0.00	1.27	1.27	0.00	0.00	12.66	1.27	6.33	0.00	0.00	1.27
0.715	0.00	1.53	6.11	3.05	0.00	0.00	0.00	0.00	4.58	0.76	0.00	0.00	2.29
0.727	0.31	49.69	1.55	1.86	0.31	0.00	0.00	1.55	0.62	4.66	0.00	0.00	0.62
0.741	1.29	18.33	2.25	1.29	0.32	0.00	0.00	6.75	0.96	0.96	0.00	0.64	1.29
0.754	2.31	0.38	0.38	3.08	3.46	0.00	0.38	11.15	5.38	0.00	0.00	0.00	1.54
0.767	0.00	0.00	48.15	3.70	3.70	3.70	0.00	0.00	0.00	0.00	0.00	0.00	0.00
0.794	0.00	4.35	17.39	4.35	0.00	4.35	4.35	4.35	0.00	0.00	0.00	0.00	0.00
0.807	6.37	2.55	14.65	1.91	0.00	15.29	2.55	0.96	0.64	0.96	0.96	1.27	1.59
0.816	1.11	2.22	1.11	1.11	1.11	0.00	0.00	0.00	1.11	33.33	0.00	0.00	0.00
0.829	0.78	0.26	3.92	1.31	0.00	0.78	0.26	0.00	1.31	1.31	0.00	0.52	0.00
0.849	1.19	3.58	18.81	1.79	8.66	1.19	0.30	1.49	1.49	9.25	0.60	4.78	0.60
0.871	0.37	4.49	71.21	0.56	0.19	0.19	0.56	0.37	0.19	0.19	0.00	7.66	0.93
0.892	3.37	4.33	5.77	3.37	0.00	6.25	2.40	3.85	0.96	19.71	0.00	0.00	0.00
0.914	0.00	12.72	12.28	1.75	0.00	0.88	0.00	1.75	0.00	14.04	0.00	0.00	0.00
0.935	1.67	24.17	1.67	0.83	0.83	4.17	0.00	4.17	0.83	1.67	0.83	0.00	0.83
0.957	0.91	6.36	10.91	2.73	0.00	10.00	0.00	0.00	8.18	2.73	0.91	0.00	0.00
0.978	0.00	0.00	3.23	6.45	0.00	3.23	0.00	0.00	0.00	0.00	0.00	0.00	0.00
1.000	0.00	0.00	8.45	0.00	0.00	16.90	0.00	0.00	0.00	0.00	0.00	4.23	2.82
1.036	0.36	5.40	0.00	0.00	20.50	4.68	0.00	10.43	6.12	0.00	5.76	0.00	0.36
1.046	1.40	15.69	0.00	8.96	0.00	23.25	0.00	0.84	1.12	0.00	0.28	1.68	1.96
1.053	0.57	4.57	2.29	2.86	0.57	10.86	0.00	2.29	1.71	4.00	1.14	1.14	0.00
1.064	1.69	21.28	0.34	2.03	1.01	17.57	0.00	4.05	1.35	1.01	1.35	0.00	0.00
1.084	0.00	20.93	0.00	3.88	0.00	15.50	0.00	0.78	3.10	4.65	0.78	0.00	0.00
1.094	4.55	2.27	0.00	2.27	0.00	18.18	0.00	0.00	0.00	0.00	0.00	0.00	0.00
1.105	0.00	0.00	0.00	0.00	0.81	29.03	0.00	0.00	0.00	0.00	0.00	0.00	0.00
1.115	1.74	0.00	0.00	0.00	0.00	17.44	0.00	0.00	2.33	0.00	3.49	5.23	1.74
1.126	1.54	0.51	0.51	1.03	1.03	24.62	0.00	0.00	7.18	0.00	1.03	3.59	0.00
1.136	1.34	0.67	0.00	7.38	2.01	14.09	0.00	0.00	2.68	0.00	1.34	0.00	0.00
1.146	0.00	0.00	0.00	3.57	0.00	25.00	0.00	0.51	3.06	0.51	2.55	4.59	2.04
1.167	0.00	28.00	0.00	0.00	0.00	12.00	0.00	4.00	4.00	0.00	0.00	0.00	0.00
1.177	0.00	8.11	0.00	2.70	0.00	9.46	0.00	0.00	5.41	1.35	0.00	10.81	0.00
1.184	0.00	0.00	0.00	18.18	0.00	20.45	0.00	0.00	2.27	0.00	2.27	2.27	0.00
1.194	1.30	18.18	0.00	1.30	0.00	2.60	0.00	5.19	0.00	0.00	1.30	0.00	0.00
1.215	0.00	9.66	0.00	2.90	0.48	13.04	0.00	8.70	4.83	0.00	2.90	0.00	0.00
1.236	0.80	2.14	4.02	1.88	0.00	14.21	0.00	9.38	4.29	1.61	0.00	12.06	0.54
1.246	0.00	0.00	8.87	2.42	0.00	4.84	0.00	13.71	0.81	0.00	1.61	0.00	0.00
1.256	0.37	0.00	0.93	2.80	0.00	10.28	0.00	1.12	0.37	0.37	0.75	0.00	0.00
1.266	0.50	0.00	2.51	4.52	1.01	9.05	0.00	4.52	0.50	0.00	1.51	0.00	0.00
1.276	0.36	3.27	6.55	1.45	0.36	10.18	0.36	1.09	5.09	0.00	2.91	2.55	0.00
1.297	0.00	0.95	4.76	0.95	0.00	6.67	0.00	0.00	0.00	0.00	1.90	0.00	0.00
1.306	0.39	0.00	2.71	2.33	0.00	9.30	0.00	0.00	6.98	0.00	0.78	0.00	0.00
1.317	2.07	0.52	1.04	1.55	4.15	10.88	0.52	1.04	4.15	0.52	8.29	0.00	0.00
1.321	0.00	1.68	0.84	1.68	3.36	1.68	0.00	1.68	0.00	0.00	0.84	0.00	0.00
1.324	2.27	22.73	0.00	2.27	0.00	6.82	0.00	2.27	3.41	0.00	2.27	1.14	0.00
1.327	2.94	8.82	2.94	6.21	0.33	21.90	0.00	1.96	2.61	0.98	0.65	4.90	0.00
1.337	2.25	1.35	0.00	5.86	0.00	15.32	0.45	0.90	0.90	0.90	0.45	0.45	0.00
1.347	0.00	0.00	6.73	1.92	0.00	9.62	0.00	2.88	0.96	0.00	2.88	2.88	0.00
1.357	1.43	0.00	0.48	5.24	0.00	6.19	0.00	3.33	1.43	0.48	1.43	0.48	0.00
1.367	0.61	0.61	1.84	4.29	1.23	7.36	0.00	4.29	1.23	0.00	0.61	0.00	0.00
1.378	0.94	1.50	1.69	0.94	3.00	8.82	0.00	4.50	2.06	0.19	0.94	0.00	0.38
1.398	2.27	2.27	0.00	1.14	3.41	7.95	0.00	5.68	1.14	0.00	2.27	1.14	0.00
1.418	0.72	0.00	2.90	1.45	0.72	15.94	0.00	3.62	3.62	0.00	0.00	0.00	0.00
1.428	1.06	3.17	3.70	1.85	0.26	9.52	0.79	1.59	3.17	0.00	2.38	0.00	0.53
1.438	0.00	0.00	0.00	4.41	1.47	0.00	0.00	0.00	2.94	0.00	2.94	0.00	0.00
1.448	0.00	0.00	0.00	3.70	13.58	0.00	0.00	11.11	0.00	0.00	1.23	0.00	1.23
1.459	3.31	1.99	8.61	1.66	1.32	3.64	0.00	1.66	2.98	0.00	4.30	4.97	0.99
1.463	0.62	0.00	0.62	13.04	0.00	8.07	0.00	0.62	1.86	0.00	4.97	1.86	0.00
1.466	0.00	2.70	2.70	0.00	0.00	2.70	0.00	0.00	0.00	8.11	0.00	0.00	0.00
1.479	3.13	0.00	3.13	15.63	0.00	0.00	0.00	0.00	0.00	0.00	0.00	0.00	0.00
1.497	0.00	0.00	7.69	15.38	7.69	0.00	0.00	0.00	0.00	0.00	0.00	0.00	0.00
1.513	0.00	0.00	0.00	0.00	20.00	0.00	0.00	0.00	0.00	0.00	0.00	0.00	0.00
1.548	0.00	0.00	15.38	0.00	0.00	3.85	0.00	0.00	0.00	0.00	3.85	0.00	0.00
1.565	0.00	0.00	0.00	0.00	0.00	0.00	0.00	0.00	0.00	0.00	0.00	0.00	0.00
1.582	0.00	0.00	21.62	0.00	13.51	2.70	0.00	0.00	5.41	0.00	2.70	0.00	0.00
1.597	0.00	0.00	29.17	18.06	1.39	6.94	0.00	0.00	0.00	0.00	0.00	1.39	0.00
1.610	0.00	0.00	47.30	11.26	15.77	9.01	0.00	0.00	0.45	0.00	0.00	0.00	0.00
1.624	0.00	0.00	43.02	4.53	0.75	2.64	0.00	0.38	4.53	0.00	0.38	0.00	0.00
1.637	0.67	1.33	20.67	0.67	2.67	0.67	0.00	2.67	0.67	0.00	6.00	0.00	0.00
1.651	1.02	0.51	36.04	5.08	0.25	7.11	0.00	0.51	0.25	1.27	1.02	0.25	0.00
1.666	0.81	1.22	2.03	2.44	0.00	4.07	0.00	13.82	1.22	9.76	1.22	0.00	0.00
1.679	2.89	3.25	3.25	4.69	0.72	5.42	0.72	2.89	3.97	6.50	0.36	1.08	0.00
1.692	0.00	7.59	6.21	2.07	1.38	2.76	0.00	0.69	1.38	0.00	2.07	0.00	0.00
1.715	0.00	7.85	11.87	5.43	0.20	6.44	0.00	11.47	0.60	0.40	1.21	0.00	0.20
1.727	0.76	1.14	15.21	11.41	0.00	3.04	0.00	4.18	2.66	0.00	2.28	0.00	0.00
1.739	0.77	5.77	20.38	1.54	0.38	6.92	0.00	0.00	4.23	0.00	0.38	0.00	0.00
1.750	0.18	1.24	2.84	21.63	10.64	7.62	0.00	5.50	0.89	0.00	1.06	0.00	0.00
1.763	0.36	0.71	5.00	3.21	7.14	1.43	0.71	12.50	2.14	0.71	1.43	0.00	0.00
1.787	0.27	13.86	5.16	1.36	5.16	5.43	0.00	11.68	1.90	0.00	0.27	2.45	0.00
1.798	0.00	2.70	2.03	6.08	10.14	6.08	0.00	7.43	0.68	0.00	2.03	0.00	0.00
1.810	0.36	13.62	0.72	3.58	6.45	3.94	1.08	2.15	1.08	0.36	2.15	2.87	0.00
1.810	0.00	7.76	1.15	10.34	1.15	4.31	0.00	11.49	2.87	3.74	2.30	0.00	0.00
1.822	0.51	3.32	9.95	12.50	2.55	6.63	0.26	4.08	2.04	3.57	2.04	0.00	0.00
1.834	0.00	1.27	16.10	6.36	0.85	7.63	0.00	2.54	1.27	2.12	1.27	0.00	0.00
1.845	0.00	0.63	1.26	8.18	0.00	3.14	0.00	5.66	0.00	21.38	1.26	0.00	0.00
1.857	1.23	18.11	0.00	2.47	0.62	1.85	0.00	14.61	1.44	5.76	0.21	0.00	0.00
1.868	0.00	3.53	18.02	0.00	0.35	10.95	0.35	1.41	4.24	0.71	0.00	16.25	0.35
1.881	0.27	5.35	1.07	5.35	0.27	7.49	0.00	3.48	1.87	0.00	0.27	0.00	0.00
1.892	0.00	0.00	0.00	9.18	0.00	4.08	0.00	10.71	2.55	0.00	0.51	0.00	0.00
1.904	0.00	9.21	1.32	1.32	0.00	19.74	0.00	2.63	3.51	0.44	1.32	8.77	1.32
1.916	0.00	4.40	3.14	21.38	0.00	21.38	0.00	5.66	2.52	0.00	1.26	0.00	0.00
1.929	0.00	13.25	0.60	11.45	0.00	4.82	0.00	9.64	1.20	1.20	4.22	0.00	0.00
1.941	1.46	5.84	0.00	4.38	0.73	2.92	0.00	0.73	0.73	0.00	0.73	0.73	0.00
1.955	0.00	3.68	0.00	8.82	0.74	1.47	0.00	0.00	0.00	1.47	0.74	3.68	0.00
1.961	0.00	2.02	0.00	11.11	1.01	0.00	0.00	0.00	1.01	6.06	3.03	0.00	0.00
1.965	0.00	1.15	2.30	2.30	0.00	0.00	0.00	4.60	0.00	1.15	1.15	0.00	0.00
1.984	0.00	0.46	0.00	1.38	0.46	3.67	0.00	3.21	1.38	0.92	0.46	0.00	0.00
2.004	2.06	1.03	3.09	2.06	0.00	5.15	0.00	8.25	0.00	1.03	5.15	0.00	0.00
2.023	1.06	2.12	0.00	21.16	0.53	25.40	0.00	3.17	0.00	1.06	3.17	0.00	0.00
2.043	0.00	3.55	1.42	2.84	0.00	2.13	0.00	7.09	0.71	0.71	0.00	0.00	0.00
2.062	0.42	0.85	10.17	9.75	0.00	7.20	0.00	6.78	3.81	1.69	0.85	0.00	0.00
2.082	0.64	0.64	0.00	0.64	1.92	1.92	0.64	24.36	1.92	0.00	0.00	0.00	0.00
2.120	0.93	17.59	0.00	2.78	0.00	0.93	0.00	21.30	2.78	0.00	0.00	0.00	0.00
2.139	1.00	1.67	0.33	0.00	0.33	1.67	0.33	6.02	2.34	0.67	2.68	17.73	1.00
2.159	0.70	0.00	0.00	1.05	11.19	1.05	0.35	1.05	2.10	1.05	3.15	39.51	6.99
2.178	0.42	11.72	0.00	1.67	0.84	1.26	0.00	10.46	0.00	1.26	1.26	0.00	0.00
2.198	2.20	1.10	0.55	9.34	0.00	2.75	0.00	1.65	2.20	14.84	1.10	0.55	0.00
2.207	1.59	6.35	0.53	3.17	0.00	3.17	0.00	1.06	2.65	9.52	1.06	3.70	0.53
2.211	1.76	5.29	0.44	1.32	0.00	3.96	0.44	4.41	6.61	1.76	2.64	7.93	2.64
2.229	0.00	1.72	0.00	0.00	0.00	0.00	0.00	7.76	0.86	2.59	0.86	1.72	0.00
2.249	0.95	0.00	0.00	5.71	0.48	5.71	0.00	9.52	11.90	0.48	0.48	8.57	5.24
2.268	1.10	0.00	0.00	1.10	1.10	3.30	1.10	4.40	13.19	1.10	0.00	7.69	0.00
2.288	0.40	1.00	0.20	1.20	0.40	2.99	0.00	0.80	1.20	0.40	0.80	20.16	1.00
2.327	0.00	6.75	0.00	1.19	0.40	0.40	0.00	7.54	1.19	0.40	7.54	0.00	1.19
2.366	0.00	11.58	0.00	5.26	0.00	0.00	0.00	7.37	2.11	0.00	1.05	0.00	0.00
2.384	0.00	0.86	59.48	0.00	1.72	0.00	0.00	0.86	1.72	0.00	0.86	0.00	0.86
2.404	0.00	1.39	0.00	1.39	0.00	1.39	0.00	1.39	4.17	0.00	1.39	0.00	0.00
2.423	0.00	0.00	0.00	8.57	0.00	0.00	0.00	0.00	14.29	0.00	0.00	0.00	0.00
2.443	1.43	2.86	0.71	7.14	0.00	2.86	0.00	0.00	3.57	0.00	2.14	0.00	0.00
2.449	22.35	0.00	0.00	0.00	0.00	0.00	0.00	4.71	1.18	0.00	3.53	0.00	0.00
2.468	0.00	2.50	0.00	10.83	0.00	0.00	0.00	1.67	1.67	0.00	0.00	0.00	0.00
2.505	0.30	0.00	2.44	1.22	0.00	0.91	0.00	1.52	1.22	1.83	0.00	0.00	0.00
2.522	2.42	1.82	2.42	1.21	0.00	2.42	0.00	15.15	6.06	6.06	0.00	0.00	0.00
2.528	0.00	0.00	9.79	0.70	0.00	2.10	0.00	7.69	2.10	4.90	0.00	0.00	0.00
2.535	0.00	0.70	46.15	1.75	1.05	2.10	0.00	1.75	7.34	0.00	0.35	0.00	0.35
2.541	0.00	3.64	0.00	10.91	3.64	0.00	0.00	0.00	1.82	0.00	1.82	0.00	0.00
2.548	0.00	2.90	7.25	1.45	0.00	0.00	0.00	5.80	5.80	0.00	5.80	0.00	0.00
2.562	0.00	0.00	22.33	1.40	1.86	3.72	0.00	8.37	1.86	0.00	0.00	0.00	0.00
2.568	0.00	3.27	16.36	2.99	0.00	0.28	0.00	3.98	0.43	1.00	9.82	2.84	0.14
2.576	0.00	0.00	2.94	2.94	0.00	0.00	0.00	11.76	2.94	0.00	0.00	0.00	0.00
2.579	0.00	1.92	1.92	0.00	0.00	0.00	0.00	1.92	1.92	3.85	0.00	0.00	0.00
2.585	0.00	0.00	4.12	7.22	0.00	0.00	1.03	6.19	2.06	0.00	3.09	1.03	0.00
2.593	1.15	0.00	14.94	0.00	5.75	1.15	0.00	1.15	2.30	0.00	0.00	0.00	0.00
2.601	0.00	0.00	22.43	2.80	9.81	2.80	0.00	0.93	0.47	0.00	0.00	0.00	0.00
2.609	0.00	0.00	16.47	1.18	0.00	0.00	0.00	1.18	2.35	0.00	1.18	20.00	1.18
2.616	0.00	0.00	13.11	0.00	0.00	1.64	0.00	6.56	0.00	0.00	0.00	0.00	1.64
2.624	0.00	0.00	12.50	0.00	0.00	4.81	0.00	4.81	8.65	0.00	0.00	0.00	0.00
2.632	0.00	0.00	18.84	0.00	0.00	0.72	0.00	2.17	0.72	1.45	2.17	0.00	0.00
2.640	0.00	0.00	23.68	0.00	0.00	0.88	0.00	14.91	4.39	0.88	2.63	0.00	0.00
2.656	0.00	0.00	27.34	1.56	0.00	1.56	0.00	0.00	1.56	0.00	0.78	0.00	0.00
2.664	0.00	0.00	18.52	3.70	0.00	0.00	0.00	1.85	0.00	0.00	0.00	14.81	5.56
2.669	0.00	0.00	8.02	0.00	9.26	0.00	0.00	3.09	0.62	1.23	1.23	16.05	4.94
2.680	0.00	0.00	0.00	0.00	0.00	0.00	0.00	3.45	0.00	0.00	0.00	0.00	0.00
2.688	0.00	3.45	3.45	0.00	0.00	0.00	3.45	10.34	0.00	0.00	0.00	0.00	0.00
2.704	0.00	0.00	0.00	0.00	0.00	4.76	0.00	7.14	0.00	0.00	0.00	0.00	0.00
2.712	1.28	0.00	2.56	0.00	1.28	1.28	0.00	11.54	0.00	0.00	1.28	1.28	0.00
2.720	0.00	0.00	2.27	0.00	2.27	0.00	0.00	2.27	0.00	0.00	0.00	2.27	0.00
2.729	0.00	0.00	0.00	0.00	0.00	1.67	0.00	0.00	0.00	3.33	0.00	1.67	0.00
2.736	0.00	0.00	0.00	0.00	0.00	5.26	0.00	0.00	0.00	0.00	5.26	0.00	0.00
2.744	0.00	0.00	10.00	22.00	0.00	8.00	0.00	4.00	0.00	0.00	0.00	0.00	0.00
2.752	0.00	0.00	0.00	0.00	0.00	0.92	0.00	16.51	0.92	4.59	0.92	0.00	0.00
2.768	0.00	0.00	1.96	3.92	0.00	0.00	0.00	13.73	1.96	11.76	0.00	0.00	0.00
2.776	0.00	0.00	0.00	5.88	0.00	5.88	0.00	11.76	0.00	11.76	0.00	0.00	0.00
2.782	0.00	0.00	0.00	0.00	0.00	0.00	0.00	0.00	0.00	0.00	0.00	0.00	0.00
2.784	0.00	0.00	4.00	0.00	20.00	0.00	0.00	0.00	0.00	0.00	0.00	0.00	0.00
2.789	4.17	0.00	4.17	0.00	0.00	4.17	0.00	4.17	8.33	0.00	0.00	0.00	0.00
2.793	0.00	0.00	5.88	0.00	0.00	0.00	0.00	0.00	11.76	0.00	0.00	0.00	0.00
2.798	0.00	0.00	9.68	0.00	0.00	0.00	0.00	6.45	3.23	0.00	3.23	0.00	0.00
2.803	0.00	0.00	0.00	0.00	0.00	0.00	0.00	0.00	8.33	8.33	0.00	0.00	0.00
2.807	0.00	0.00	0.00	0.00	0.00	0.00	0.00	6.67	0.00	15.56	0.00	0.00	0.00
2.814	0.00	2.04	0.00	0.00	0.00	0.00	0.00	6.12	0.00	20.41	2.04	0.00	0.00
2.839	0.00	0.00	0.00	0.00	0.00	0.00	0.00	0.00	11.11	0.00	0.00	0.00	0.00
2.844	0.00	0.00	0.00	0.00	0.00	0.00	0.00	0.00	0.00	0.00	0.00	9.09	0.00
2.853	0.00	0.00	0.00	0.00	0.00	0.00	0.00	0.00	0.00	0.00	0.00	0.00	0.00
2.857	0.00	0.00	0.00	0.00	0.00	0.00	0.00	4.76	0.00	0.00	0.00	4.76	0.00
2.862	0.00	0.00	8.33	0.00	0.00	0.00	0.00	0.00	8.33	0.00	0.00	16.67	0.00
2.872	0.00	0.00	2.63	0.00	0.00	0.00	0.00	0.00	5.26	0.00	0.00	28.95	2.63
2.874	0.00	0.00	3.13	0.00	0.00	0.00	0.00	0.00	3.13	0.00	0.00	3.13	0.00
2.899	0.00	0.00	0.00	0.00	0.00	6.45	0.00	6.45	0.00	0.00	3.23	6.45	3.23
2.903	0.00	0.00	0.00	0.00	0.00	0.00	0.00	3.13	0.00	0.00	3.13	18.75	0.00
2.908	0.00	0.00	0.00	10.00	0.00	10.00	0.00	0.00	0.00	0.00	0.00	10.00	0.00
2.913	0.00	0.00	5.00	0.00	0.00	5.00	0.00	0.00	0.00	0.00	0.00	15.00	0.00
2.922	0.00	0.00	1.75	0.00	0.00	0.00	0.00	1.75	3.51	0.00	0.00	17.54	3.51
2.926	0.00	0.00	2.33	2.33	0.00	2.33	2.33	0.00	0.00	0.00	0.00	4.65	2.33
2.931	0.00	0.00	2.56	0.00	0.00	0.00	0.00	0.00	0.00	0.00	0.00	23.08	2.56
2.940	0.00	0.00	0.00	3.33	0.00	0.00	0.00	0.00	0.00	0.00	0.00	20.00	6.67
2.958	0.00	0.00	0.00	3.23	0.00	0.00	0.00	3.23	0.00	0.00	0.00	6.45	0.00
2.963	0.00	0.00	0.00	0.00	0.00	0.00	0.00	0.00	0.00	0.00	5.00	40.00	0.00
2.967	0.00	0.00	0.00	0.00	0.00	0.00	0.00	3.08	1.54	0.00	0.00	69.23	0.00
2.972	0.00	3.33	0.00	0.00	0.00	0.00	0.00	0.00	0.00	0.00	0.00	0.00	0.00
2.982	0.00	0.00	2.27	0.00	0.00	0.00	0.00	0.00	0.00	0.00	0.00	0.00	0.00
2.986	0.00	0.00	0.00	0.00	0.00	0.00	0.00	18.18	0.00	0.00	0.00	0.00	0.00
2.991	0.00	0.00	0.00	0.00	0.00	0.00	0.00	30.00	10.00	0.00	0.00	0.00	0.00
3.000	0.00	0.00	0.00	5.26	0.00	0.00	0.00	0.00	5.26	0.00	0.00	15.79	0.00
3.004	0.00	0.00	0.00	0.00	0.00	2.86	0.00	5.71	0.00	0.00	0.00	11.43	0.00
3.018	0.00	11.11	0.00	0.00	0.00	0.00	0.00	11.11	0.00	3.70	0.00	0.00	0.00
3.023	1.72	0.00	1.72	5.17	0.00	0.00	0.00	12.07	0.00	5.17	0.00	0.00	0.00
3.032	0.00	2.78	0.00	2.78	0.00	0.00	0.00	16.67	2.78	0.00	0.00	0.00	0.00
3.035	0.00	5.26	0.00	0.00	0.00	0.00	0.00	5.26	0.00	0.00	0.00	0.00	0.00
3.078	4.00	0.00	0.00	0.00	0.00	0.00	0.00	16.00	0.00	8.00	12.00	0.00	0.00
3.083	3.70	0.00	0.00	0.00	0.00	0.00	0.00	14.81	0.00	3.70	0.00	0.00	0.00
3.092	0.00	0.00	0.00	4.76	0.00	0.00	0.00	0.00	0.00	0.00	0.00	0.00	0.00
3.097	0.00	1.85	0.00	0.00	0.00	0.00	0.00	1.85	0.00	1.85	0.00	0.00	0.00
3.101	0.00	3.85	0.00	3.85	0.00	0.00	0.00	7.69	0.00	0.00	0.00	0.00	0.00
3.111	0.00	0.00	2.54	0.00	0.85	5.08	0.00	1.69	3.39	0.85	0.00	0.00	0.00
3.115	0.00	0.83	0.83	0.00	5.79	0.83	0.00	2.48	0.83	0.00	0.00	7.44	2.48
3.116	0.00	1.75	0.00	1.75	0.00	1.75	0.00	3.51	1.75	0.00	0.00	33.33	3.51
3.138	0.00	0.00	0.00	0.00	0.00	5.56	0.00	11.11	0.00	0.00	0.00	0.00	0.00
3.146	0.00	0.00	0.00	0.00	0.00	0.00	0.00	7.69	0.00	0.00	0.00	0.00	0.00
3.148	0.00	6.90	0.00	0.00	0.00	3.45	0.00	3.45	3.45	0.00	0.00	0.00	0.00
3.197	0.00	1.52	0.00	0.00	0.00	13.64	0.00	7.58	0.00	4.55	0.00	0.00	4.55
3.202	0.00	0.00	0.00	0.00	0.00	0.00	0.00	14.81	0.00	0.00	0.00	7.41	0.00
3.204	0.00	6.45	0.00	0.00	3.23	6.45	0.00	6.45	3.23	0.00	0.00	3.23	6.45
3.208	0.00	1.05	5.26	0.00	0.00	2.11	0.00	8.95	0.00	3.68	0.00	4.21	17.37
3.213	1.28	0.00	0.00	0.00	0.00	0.00	0.00	12.82	0.00	2.56	0.00	10.26	12.82
3.218	0.00	0.00	0.00	0.00	0.00	0.00	0.00	8.82	0.00	23.53	0.00	20.59	0.00
3.222	0.00	0.00	0.00	0.00	0.00	0.00	0.00	0.00	0.00	12.50	0.00	0.00	0.00
3.227	0.00	0.00	3.28	0.00	0.00	0.00	0.00	4.92	1.64	4.92	0.00	8.20	32.79
3.236	0.00	0.00	22.00	0.00	0.00	0.00	0.00	4.00	0.00	4.00	0.00	0.00	0.00
3.241	0.00	0.00	6.67	0.00	0.00	0.00	0.00	6.67	0.00	0.00	0.00	0.00	0.00
3.246	0.00	0.00	0.00	0.00	0.00	0.00	0.00	10.34	0.00	3.45	0.00	0.00	0.00
3.255	0.00	0.00	0.00	0.00	0.00	0.00	0.00	0.00	0.00	0.00	5.56	11.11	5.56
3.259	0.00	0.00	0.00	0.00	3.45	0.00	0.00	6.90	0.00	0.00	3.45	3.45	0.00
3.261	0.00	0.00	0.00	0.00	0.00	0.00	0.00	6.25	0.00	34.38	0.00	3.13	0.00
3.265	2.17	0.00	4.35	0.00	0.00	0.00	0.00	6.52	2.17	17.39	0.00	0.00	0.00
3.270	0.00	0.00	5.26	0.00	0.00	0.00	0.00	0.00	0.00	0.00	0.00	0.00	0.00
3.275	0.00	2.08	8.33	0.00	0.00	0.00	2.08	4.17	0.00	10.42	2.08	0.00	0.00
3.279	0.00	4.76	10.71	0.00	0.00	1.19	0.00	9.52	0.00	1.19	1.19	5.95	0.00
3.320	0.00	0.00	2.44	0.00	0.00	0.00	0.00	4.88	0.00	4.88	2.44	0.00	2.44
3.325	0.00	0.00	0.00	0.00	0.00	0.00	0.00	4.17	0.00	0.00	0.00	0.00	0.00
3.330	2.44	2.44	0.00	0.00	0.00	0.00	0.00	12.20	0.00	2.44	0.00	0.00	0.00
3.342	0.00	0.00	10.17	1.69	5.08	0.00	1.69	10.17	5.08	0.00	0.00	0.00	0.00
3.355	0.00	1.59	4.76	0.00	0.00	0.00	0.00	6.35	0.00	0.00	0.00	1.59	1.59
3.360	0.00	0.00	6.00	0.00	0.00	0.00	0.00	16.00	0.00	2.00	0.00	0.00	0.00
3.380	0.00	1.47	0.00	0.00	0.00	0.00	0.00	7.35	0.00	0.00	0.00	0.00	0.00
3.385	0.00	0.00	0.00	0.00	0.00	0.00	2.02	27.27	0.00	0.00	3.03	1.01	0.00
3.394	0.00	0.00	0.88	0.00	0.00	1.77	0.00	13.27	0.00	0.00	8.85	0.88	0.00
3.399	0.00	0.00	0.00	0.00	0.00	0.00	0.00	10.26	0.00	0.00	2.56	0.00	0.00
3.403	1.22	1.22	3.66	0.00	0.00	0.00	2.44	8.54	0.00	0.00	2.44	0.00	0.00
3.408	0.00	0.89	0.00	0.00	0.00	0.00	0.00	14.29	0.00	0.00	24.11	0.00	0.89
3.413	0.00	0.00	2.38	0.00	0.00	0.00	0.00	16.67	0.00	0.00	9.52	0.00	0.00
3.417	0.00	0.00	0.00	0.00	0.00	0.00	0.00	27.78	0.00	0.00	0.00	0.00	0.00
3.422	0.00	0.00	0.00	5.00	0.00	0.00	0.00	20.00	0.00	0.00	5.00	0.00	0.00
3.430	0.00	0.00	7.41	3.70	0.00	0.00	0.00	22.22	0.00	0.00	0.00	0.00	0.00
3.432	0.00	0.00	0.00	4.17	4.17	0.00	0.00	12.50	0.00	0.00	4.17	0.00	0.00
3.440	0.00	0.00	0.00	0.00	0.00	0.00	0.00	11.11	0.00	0.00	0.00	0.00	0.00
3.444	0.00	0.00	0.00	2.86	0.00	0.00	0.00	14.29	0.00	0.00	5.71	0.00	0.00
3.454	0.00	0.00	4.08	0.00	0.00	0.00	0.00	16.33	0.00	0.00	2.04	0.00	0.00
3.499	0.00	0.00	0.00	0.00	0.00	0.00	4.26	8.51	2.13	6.38	0.00	4.26	4.26
3.504	0.00	0.00	3.13	0.00	0.00	0.00	9.38	0.00	0.00	0.00	0.00	6.25	0.00
3.513	0.00	0.00	0.00	0.00	0.00	0.00	0.00	5.88	0.00	0.00	0.00	11.76	0.00
3.518	0.00	0.00	0.00	0.00	0.00	3.85	0.00	0.00	0.00	0.00	3.85	3.85	3.85
3.523	0.00	0.00	2.86	0.00	0.00	0.00	0.00	2.86	0.00	0.00	2.86	0.00	0.00
3.527	0.00	0.00	0.00	0.00	0.00	0.00	2.56	2.56	0.00	0.00	0.00	0.00	0.00
3.531	0.00	0.00	0.00	0.00	0.00	0.00	0.00	9.52	0.00	0.00	4.76	0.00	0.00
3.559	0.00	0.00	0.00	0.00	0.00	0.00	6.25	6.25	0.00	0.00	0.00	6.25	25.00
3.564	0.00	4.35	4.35	0.00	0.00	0.00	0.00	2.17	0.00	0.00	8.70	4.35	4.35
3.568	0.00	0.00	0.00	0.00	0.00	0.00	0.00	2.27	0.00	0.00	2.27	9.09	2.27
3.619	0.00	3.03	0.00	0.00	0.00	0.00	0.00	15.15	3.03	0.00	0.00	0.00	0.00
3.623	0.00	0.00	0.00	3.57	0.00	0.00	14.29	0.00	0.00	0.00	0.00	17.86	10.71
3.633	0.00	8.11	0.00	0.00	0.00	2.70	0.00	2.70	0.00	0.00	2.70	13.51	0.00
3.637	0.00	15.38	7.69	0.00	0.00	3.85	3.85	3.85	0.00	0.00	0.00	3.85	0.00
3.642	0.00	2.94	0.00	0.00	0.00	5.88	0.00	11.76	0.00	0.00	0.00	14.71	0.00
3.651	0.00	0.00	0.00	0.00	0.00	12.50	2.50	32.50	0.00	0.00	0.00	15.00	0.00
3.652	0.00	13.33	0.00	0.00	0.00	0.00	0.00	20.00	0.00	0.00	0.00	23.33	0.00
3.674	0.00	4.65	4.65	0.00	0.00	2.33	2.33	23.26	0.00	2.33	0.00	16.28	4.65
3.678	0.00	0.00	0.00	0.00	0.00	6.67	0.00	26.67	0.00	0.00	6.67	0.00	0.00
3.679	0.00	0.00	0.00	0.00	0.00	7.69	0.00	23.08	0.00	0.00	7.69	0.00	7.69
3.681	0.00	0.00	0.00	0.00	0.00	28.57	3.57	21.43	0.00	0.00	7.14	0.00	3.57
3.726	0.00	2.25	0.00	0.00	0.00	0.00	2.25	14.61	1.12	0.00	1.12	7.87	25.84
4.093	0.00	0.00	2.04	0.00	0.00	12.24	0.00	6.12	0.00	4.08	0.00	0.00	0.00
4.161	0.00	7.84	0.00	0.00	0.00	1.96	0.00	21.57	0.00	9.80	0.00	0.00	0.00
4.207	0.00	2.50	0.00	0.00	0.00	6.25	13.75	12.50	0.00	10.00	0.00	0.00	0.00
4.232	0.00	6.38	0.00	0.00	0.00	12.77	4.26	14.89	0.00	17.02	2.13	0.00	2.13
4.240	0.00	7.69	0.00	0.00	0.00	3.85	3.85	15.38	0.00	3.85	3.85	0.00	0.00
4.415	0.00	0.00	0.00	1.87	1.87	2.80	20.56	3.74	1.87	2.80	0.00	14.95	16.82
4.418	0.00	0.00	0.00	0.00	0.00	4.00	8.00	8.00	0.00	0.00	0.00	0.00	0.00
4.421	0.00	0.00	0.00	0.00	12.50	0.00	0.00	37.50	0.00	0.00	0.00	0.00	0.00
4.427	0.00	7.69	0.00	0.00	0.00	7.69	7.69	30.77	0.00	0.00	0.00	0.00	0.00
4.459	0.00	0.00	0.00	0.00	0.00	0.00	8.70	0.00	0.00	0.00	0.00	13.04	8.70
4.463	0.00	3.13	0.00	0.00	0.00	0.00	0.00	9.38	0.00	0.00	3.13	0.00	0.00
4.503	0.00	0.00	0.00	0.00	0.00	4.76	0.00	9.52	0.00	0.00	0.00	0.00	0.00
4.507	0.00	0.00	2.94	0.00	0.00	5.88	0.00	0.00	2.94	17.65	0.00	0.00	5.88
4.517	0.00	0.00	0.00	0.00	0.00	3.33	0.00	20.00	0.00	0.00	0.00	0.00	0.00
4.521	0.00	0.00	0.00	0.00	9.68	0.00	0.00	0.00	0.00	0.00	6.45	0.00	0.00
4.528	0.00	0.00	0.00	0.00	0.00	5.88	0.00	5.88	0.00	0.00	0.00	0.00	0.00
4.529	0.00	0.00	0.00	0.00	4.00	0.00	8.00	4.00	0.00	0.00	4.00	0.00	0.00
4.548	0.00	2.04	4.08	4.08	12.24	0.00	0.00	16.33	2.04	0.00	2.04	0.00	2.04
4.551	0.00	0.00	4.35	0.00	8.70	4.35	0.00	8.70	0.00	0.00	0.00	0.00	0.00
4.558	0.00	0.00	0.00	0.00	0.00	0.00	8.33	0.00	0.00	0.00	0.00	0.00	8.33
4.561	0.00	5.26	0.00	0.00	0.00	0.00	0.00	5.26	0.00	0.00	0.00	10.53	15.79
4.565	0.00	0.00	0.00	0.00	0.00	0.00	0.00	10.00	5.00	0.00	0.00	0.00	5.00
4.568	0.00	0.00	0.00	0.00	0.00	0.00	0.00	6.06	0.00	0.00	0.00	3.03	9.09
4.572	0.00	0.00	0.00	0.00	2.17	0.00	0.00	6.52	0.00	2.17	0.00	4.35	4.35
4.575	0.00	0.00	0.00	0.00	0.00	0.00	0.00	3.45	0.00	0.00	0.00	0.00	6.90
4.579	0.00	0.00	0.00	0.00	0.00	0.00	0.00	12.90	9.68	0.00	0.00	0.00	9.68
4.581	0.00	0.00	0.00	0.00	0.00	0.00	0.00	8.70	0.00	0.00	0.00	0.00	0.00
4.592	0.00	0.00	0.00	0.00	0.00	0.00	4.35	4.35	0.00	0.00	0.00	4.35	0.00
4.596	0.00	0.00	7.69	0.00	0.00	0.00	0.00	15.38	0.00	0.00	0.00	0.00	0.00
4.603	0.00	0.00	0.00	0.00	0.00	0.00	5.26	10.53	0.00	0.00	0.00	5.26	21.05
4.606	0.00	0.00	0.00	0.00	0.00	0.00	7.69	0.00	0.00	0.00	0.00	0.00	0.00
4.608	0.00	0.00	0.00	0.00	0.00	0.00	0.00	16.67	0.00	0.00	0.00	0.00	0.00
4.636	0.00	0.00	0.00	0.00	0.00	0.00	5.88	5.88	0.00	0.00	0.00	5.88	0.00
4.641	0.00	0.00	6.25	0.00	0.00	0.00	0.00	0.00	0.00	0.00	0.00	12.50	0.00
4.644	0.00	0.00	12.50	0.00	0.00	0.00	0.00	6.25	0.00	0.00	0.00	0.00	0.00
4.649	0.00	0.00	0.00	8.00	16.00	0.00	4.00	12.00	4.00	0.00	0.00	0.00	0.00
4.653	0.00	0.00	0.00	0.00	21.74	0.00	0.00	0.00	0.00	0.00	0.00	4.35	0.00
4.656	0.00	0.00	0.00	0.00	10.00	0.00	10.00	20.00	0.00	0.00	0.00	0.00	0.00
4.663	0.00	0.00	0.00	0.00	0.00	0.00	0.00	4.35	0.00	0.00	2.17	4.35	2.17
4.667	0.00	0.00	0.00	0.00	0.00	0.00	8.33	12.50	0.00	0.00	0.00	12.50	12.50
4.670	0.00	0.00	0.00	0.00	3.33	0.00	3.33	20.00	0.00	0.00	0.00	0.00	3.33
4.674	0.00	0.00	0.00	0.00	16.67	0.00	0.00	16.67	0.00	0.00	0.00	0.00	0.00
4.680	0.00	0.00	0.00	0.00	0.00	0.00	5.88	11.76	0.00	0.00	0.00	0.00	0.00
4.684	0.00	0.00	0.00	0.00	0.00	0.00	4.76	0.00	0.00	0.00	0.00	0.00	9.52
4.687	0.00	0.00	0.00	0.00	0.00	0.00	0.00	24.00	0.00	0.00	0.00	8.00	8.00
4.691	0.00	0.00	0.00	0.00	0.00	0.00	0.00	21.05	0.00	0.00	0.00	5.26	42.11
4.698	0.00	0.00	0.00	0.00	0.00	0.00	0.00	20.00	0.00	0.00	0.00	6.67	26.67
4.701	0.00	0.00	0.00	0.00	0.00	0.00	0.00	22.22	0.00	0.00	0.00	11.11	11.11
4.705	0.00	0.00	0.00	0.00	0.00	0.00	0.00	35.29	0.00	0.00	0.00	0.00	0.00
4.712	0.00	0.00	0.00	0.00	1.49	0.00	0.00	2.99	1.49	0.00	0.00	13.43	14.93
4.713	0.00	0.00	0.00	0.00	0.00	0.00	4.55	13.64	0.00	0.00	0.00	9.09	4.55
4.730	0.00	0.00	0.00	0.00	0.00	0.00	0.00	0.00	0.00	0.00	0.00	0.00	0.00
4.733	0.00	0.00	0.00	0.00	0.00	0.00	3.57	7.14	0.00	0.00	0.00	0.00	3.57
4.736	0.00	0.00	0.00	0.00	0.00	0.00	0.00	60.00	0.00	0.00	0.00	0.00	0.00
4.740	0.00	0.00	0.00	0.00	0.00	0.00	5.26	26.32	5.26	5.26	0.00	0.00	0.00
4.747	0.00	0.00	0.00	0.00	0.00	3.45	0.00	24.14	3.45	0.00	0.00	0.00	0.00
4.750	0.00	0.00	3.13	0.00	3.13	0.00	3.13	6.25	0.00	0.00	0.00	0.00	0.00
4.754	0.00	7.89	0.00	0.00	2.63	0.00	2.63	7.89	0.00	0.00	0.00	2.63	0.00
4.759	0.00	0.00	0.00	0.00	0.00	0.00	5.00	15.00	0.00	10.00	0.00	0.00	0.00
4.769	0.00	0.00	0.00	0.00	17.39	0.00	4.35	17.39	0.00	4.35	0.00	0.00	0.00
4.773	0.00	0.00	0.00	0.00	23.08	0.00	0.00	23.08	0.00	0.00	0.00	0.00	0.00
4.776	0.00	0.00	0.00	0.00	0.00	0.00	0.00	12.50	25.00	0.00	0.00	12.50	0.00
4.780	0.00	0.00	0.00	0.00	0.00	0.00	0.00	0.00	0.00	0.00	0.00	0.00	0.00
4.786	0.00	0.00	0.00	0.00	0.00	0.00	0.00	18.18	0.00	0.00	0.00	0.00	0.00
4.790	0.00	0.00	0.00	0.00	0.00	0.00	0.00	0.00	0.00	0.00	0.00	0.00	0.00
4.793	0.00	6.67	0.00	0.00	13.33	0.00	0.00	13.33	0.00	0.00	0.00	0.00	0.00
4.797	0.00	0.00	0.00	0.00	0.00	0.00	0.00	8.33	0.00	0.00	0.00	0.00	0.00
4.800	0.00	0.00	0.00	0.00	0.00	0.00	0.00	0.00	0.00	0.00	0.00	0.00	0.00
4.807	0.00	0.00	0.00	0.00	0.00	0.00	0.00	0.00	6.67	0.00	0.00	0.00	6.67
4.811	0.00	0.00	0.00	0.00	8.33	0.00	0.00	8.33	0.00	0.00	0.00	0.00	0.00
4.811	0.00	0.00	0.00	0.00	0.00	0.00	0.00	0.00	0.00	0.00	0.00	0.00	0.00
4.813	0.00	0.00	0.00	7.69	0.00	0.00	0.00	0.00	7.69	0.00	0.00	0.00	0.00
4.817	0.00	0.00	0.00	0.00	0.00	0.00	0.00	11.11	0.00	0.00	0.00	0.00	0.00
4.820	0.00	0.00	0.00	0.00	0.00	0.00	9.09	18.18	0.00	0.00	0.00	0.00	0.00
4.824	0.00	0.00	0.00	0.00	0.00	0.00	0.00	28.57	0.00	0.00	0.00	0.00	0.00
4.831	0.00	0.00	0.00	0.00	7.69	0.00	0.00	0.00	0.00	0.00	0.00	0.00	0.00
4.834	0.00	0.00	0.00	7.69	7.69	0.00	0.00	7.69	0.00	0.00	0.00	0.00	7.69
4.838	0.00	0.00	0.00	0.00	0.00	0.00	0.00	11.11	0.00	0.00	0.00	0.00	5.56
4.841	0.00	0.00	3.85	0.00	0.00	0.00	0.00	0.00	3.85	0.00	0.00	0.00	0.00
4.848	0.00	0.00	0.00	0.00	0.00	0.00	0.00	0.00	0.00	0.00	0.00	0.00	10.00
4.849	0.00	0.00	11.11	0.00	0.00	0.00	0.00	11.11	11.11	0.00	0.00	0.00	0.00
4.862	0.00	0.00	0.00	0.00	0.00	0.00	0.00	4.35	0.00	0.00	0.00	4.35	0.00
4.866	0.00	0.00	0.00	0.00	0.00	0.00	0.00	8.33	0.00	0.00	0.00	8.33	8.33
4.869	0.00	0.00	0.00	2.86	0.00	0.00	0.00	11.43	0.00	0.00	0.00	0.00	0.00
4.872	0.00	0.00	0.00	0.00	0.00	0.00	0.00	16.67	0.00	0.00	0.00	0.00	0.00
4.879	0.00	0.00	0.00	0.00	0.00	0.00	0.00	16.67	0.00	0.00	0.00	0.00	0.00
4.883	0.00	7.69	0.00	0.00	0.00	0.00	0.00	23.08	0.00	0.00	0.00	0.00	0.00
4.886	0.00	0.00	0.00	0.00	0.00	0.00	4.00	4.00	0.00	0.00	0.00	12.00	0.00
4.889	0.00	0.00	0.00	0.00	0.00	0.00	0.00	11.11	0.00	0.00	0.00	0.00	0.00
4.893	0.00	0.00	9.09	0.00	0.00	0.00	0.00	9.09	0.00	0.00	0.00	0.00	9.09
4.900	0.00	0.00	6.25	0.00	0.00	0.00	0.00	0.00	0.00	0.00	0.00	0.00	18.75
4.902	0.00	0.00	5.88	0.00	0.00	0.00	0.00	11.76	5.88	0.00	0.00	0.00	0.00
4.903	0.00	0.00	0.00	0.00	0.00	0.00	0.00	26.67	0.00	0.00	0.00	0.00	0.00
4.905	0.00	4.76	0.00	0.00	0.00	4.76	0.00	14.29	0.00	0.00	0.00	14.29	0.00
4.908	0.00	0.00	0.00	0.00	5.88	5.88	0.00	0.00	0.00	0.00	0.00	11.76	0.00
4.912	0.00	0.00	0.00	0.00	0.00	0.00	0.00	8.33	0.00	0.00	0.00	8.33	0.00
4.919	0.00	0.00	4.55	0.00	0.00	0.00	0.00	9.09	0.00	0.00	0.00	4.55	0.00
4.926	0.00	0.00	0.00	0.00	0.00	0.00	0.00	15.00	5.00	0.00	0.00	0.00	0.00
4.929	0.00	0.00	0.00	0.00	0.00	5.88	0.00	11.76	0.00	0.00	0.00	0.00	5.88
4.936	0.00	0.00	0.00	0.00	0.00	0.00	0.00	11.11	0.00	0.00	0.00	0.00	0.00
4.946	0.00	0.00	0.00	0.00	0.00	0.00	22.22	33.33	0.00	0.00	0.00	0.00	0.00
4.950	0.00	0.00	0.00	0.00	4.00	0.00	8.00	4.00	0.00	0.00	0.00	0.00	0.00
4.957	0.00	2.11	0.00	0.00	2.11	4.21	3.16	0.00	0.00	0.00	0.00	0.00	1.05
4.959	0.00	0.00	0.00	0.00	0.00	0.00	6.52	2.17	0.00	0.00	0.00	0.00	0.00
4.960	0.00	0.00	0.00	0.00	6.06	1.52	0.00	0.00	1.52	0.00	0.00	0.00	3.03
4.990	0.00	0.00	0.00	0.00	0.00	0.00	8.00	4.00	0.00	0.00	0.00	0.00	0.00
4.994	0.00	0.00	0.00	0.00	0.00	0.00	10.00	0.00	0.00	0.00	0.00	10.00	0.00
5.000	0.00	0.00	14.29	0.00	0.00	0.00	0.00	0.00	0.00	0.00	0.00	0.00	0.00
5.003	0.00	0.00	0.00	0.00	0.00	13.04	4.35	21.74	0.00	0.00	0.00	0.00	0.00
5.006	0.00	3.57	3.57	0.00	0.00	0.00	3.57	28.57	0.00	0.00	0.00	0.00	3.57
5.023	0.00	18.75	0.00	0.00	0.00	0.00	0.00	6.25	0.00	0.00	0.00	0.00	0.00
5.027	0.00	0.00	0.00	0.00	0.00	0.00	0.00	0.00	0.00	0.00	0.00	0.00	0.00
5.030	0.00	3.57	0.00	0.00	3.57	0.00	3.57	10.71	10.71	3.57	0.00	3.57	0.00
5.035	0.00	4.55	0.00	0.00	2.27	2.27	0.00	15.91	0.00	0.00	0.00	4.55	0.00
5.038	0.00	3.13	0.00	0.00	0.00	0.00	0.00	21.88	0.00	0.00	0.00	3.13	0.00
5.040	0.00	0.00	0.00	0.00	0.00	5.41	2.70	27.03	0.00	2.70	0.00	0.00	0.00
5.052	0.00	0.00	4.00	0.00	0.00	0.00	4.00	12.00	0.00	0.00	0.00	12.00	0.00
5.055	0.00	11.11	0.00	0.00	0.00	0.00	0.00	18.52	0.00	11.11	0.00	3.70	0.00
5.059	0.00	19.35	0.00	0.00	6.45	0.00	0.00	19.35	0.00	0.00	0.00	0.00	0.00
5.062	0.00	2.13	0.00	0.00	0.00	0.00	0.00	4.26	0.00	10.64	0.00	2.13	4.26
5.067	0.00	0.00	0.00	0.00	0.00	0.00	0.00	13.79	0.00	20.69	0.00	3.45	0.00
5.081	0.00	5.56	0.00	0.00	11.11	0.00	0.00	5.56	0.00	5.56	0.00	0.00	0.00
5.083	0.00	0.00	0.00	0.00	0.00	0.00	0.00	6.45	0.00	0.00	3.23	0.00	0.00
5.085	0.00	0.00	0.00	0.00	0.00	0.00	0.00	15.79	0.00	2.63	0.00	0.00	0.00
5.087	0.00	0.00	0.00	0.00	0.00	0.00	0.00	14.58	0.00	0.00	0.00	0.00	0.00
5.092	0.00	0.00	0.00	0.00	3.03	0.00	0.00	21.21	0.00	0.00	0.00	9.09	0.00
5.094	0.00	5.88	0.00	0.00	0.00	0.00	0.00	25.00	1.47	0.00	0.00	7.35	2.94
5.109	0.00	5.56	2.78	0.00	2.78	0.00	2.78	8.33	0.00	0.00	2.78	13.89	0.00
5.112	0.00	8.82	2.94	0.00	5.88	8.82	0.00	2.94	0.00	5.88	0.00	11.76	0.00
5.115	0.00	9.09	0.00	0.00	0.00	4.55	9.09	18.18	0.00	4.55	0.00	4.55	0.00
5.117	0.00	0.00	0.00	0.00	3.57	0.00	5.36	7.14	0.00	3.57	0.00	3.57	0.00
5.121	0.00	2.27	0.00	0.00	0.00	0.00	6.82	13.64	0.00	0.00	0.00	4.55	4.55
5.125	0.00	3.33	0.00	0.00	0.00	3.33	3.33	13.33	0.00	0.00	0.00	3.33	0.00
5.126	0.00	0.00	0.00	0.00	4.17	0.00	0.00	0.00	0.00	0.00	0.00	20.83	0.00
5.129	0.00	3.23	0.00	0.00	0.00	0.00	3.23	6.45	0.00	3.23	0.00	9.68	0.00
5.131	0.00	2.13	0.00	0.00	0.00	0.00	0.00	12.77	0.00	4.26	0.00	17.02	2.13
5.135	0.00	4.84	0.00	0.00	0.00	0.00	0.00	20.97	0.00	0.00	1.61	9.68	1.61
5.138	0.00	7.14	0.00	0.00	7.14	0.00	0.00	28.57	0.00	0.00	0.00	0.00	0.00
5.140	0.00	0.00	0.00	0.00	0.00	0.00	0.00	15.38	0.00	0.00	5.13	5.13	0.00
5.144	0.00	4.35	0.00	0.00	0.00	0.00	0.00	8.70	0.00	0.00	0.00	4.35	0.00
5.146	0.00	0.00	8.33	0.00	0.00	8.33	0.00	16.67	0.00	8.33	0.00	8.33	0.00
5.153	0.00	2.86	2.86	0.00	0.00	0.00	0.00	14.29	2.86	0.00	0.00	8.57	0.00
5.155	0.00	3.03	3.03	0.00	0.00	0.00	0.00	18.18	0.00	0.00	0.00	12.12	0.00
5.157	0.00	0.00	0.00	0.00	4.35	0.00	4.35	13.04	4.35	0.00	0.00	0.00	0.00
5.167	0.00	2.56	0.00	0.00	0.00	0.00	0.00	20.51	0.00	0.00	0.00	7.69	2.56
5.171	0.00	0.00	0.00	0.00	0.00	0.00	6.67	0.00	0.00	0.00	0.00	0.00	0.00
5.173	0.00	0.00	0.00	0.00	0.00	0.00	0.00	30.30	3.03	0.00	0.00	3.03	0.00
5.175	0.00	0.00	0.00	0.00	0.00	0.00	0.00	11.76	0.00	0.00	0.00	5.88	0.00
5.180	0.00	15.38	0.00	0.00	0.00	0.00	0.00	15.38	7.69	0.00	0.00	0.00	0.00
5.182	0.00	0.00	0.00	0.00	0.00	0.00	0.00	8.33	0.00	0.00	0.00	5.56	0.00
5.182	0.00	0.00	0.00	0.00	0.00	0.00	0.00	10.34	0.00	0.00	0.00	6.90	0.00
5.196	0.00	0.00	2.04	0.00	0.00	0.00	0.00	26.53	0.00	2.04	0.00	4.08	0.00
5.198	0.00	0.00	0.00	0.00	0.00	0.00	0.00	20.83	4.17	0.00	0.00	0.00	0.00
5.201	0.00	0.00	2.63	0.00	2.63	0.00	2.63	23.68	0.00	0.00	0.00	0.00	0.00
5.203	0.00	0.00	0.00	0.00	0.00	0.00	0.00	3.45	0.00	0.00	0.00	6.90	0.00
5.205	0.00	0.00	3.64	0.00	0.00	0.00	0.00	14.55	0.00	0.00	0.00	10.91	0.00
5.207	0.00	3.51	3.51	0.00	0.00	0.00	0.00	15.79	0.00	0.00	0.00	15.79	0.00
5.210	0.00	3.23	0.00	0.00	0.00	4.84	0.00	6.45	0.00	6.45	1.61	0.00	0.00
5.212	0.00	0.00	0.00	0.00	5.00	5.00	0.00	10.00	0.00	0.00	5.00	0.00	0.00
5.216	0.00	0.00	0.00	0.00	0.00	0.00	0.00	6.25	0.00	0.00	0.00	0.00	0.00
5.218	0.00	0.00	0.00	0.00	0.00	0.00	0.00	25.00	0.00	0.00	0.00	0.00	0.00
5.221	0.00	0.00	0.00	0.00	6.90	0.00	0.00	0.00	0.00	20.69	0.00	0.00	0.00
5.225	0.00	0.00	0.00	0.00	0.00	0.00	0.00	0.00	0.00	0.00	0.00	15.38	0.00
5.227	0.00	0.00	0.00	0.00	5.88	5.88	0.00	5.88	0.00	5.88	0.00	11.76	11.76
5.229	0.00	0.00	0.00	0.00	0.00	4.76	0.00	4.76	0.00	0.00	0.00	0.00	0.00
5.232	0.00	0.00	0.00	0.00	0.00	0.00	5.88	5.88	5.88	0.00	0.00	0.00	0.00
5.236	0.00	0.00	0.00	0.00	17.65	0.00	0.00	0.00	0.00	0.00	0.00	0.00	0.00
5.240	0.00	0.00	0.00	0.00	0.00	0.00	0.00	0.00	0.00	0.00	0.00	0.00	0.00
5.254	0.00	0.00	0.00	0.00	6.67	0.00	0.00	13.33	0.00	6.67	0.00	6.67	6.67
5.256	0.00	0.00	4.35	0.00	0.00	0.00	0.00	8.70	0.00	0.00	4.35	0.00	4.35
5.258	0.00	0.00	0.00	0.00	0.00	0.00	0.00	16.67	0.00	0.00	0.00	0.00	0.00
5.260	0.00	0.00	0.00	0.00	0.00	3.13	0.00	15.63	0.00	0.00	0.00	3.13	0.00
5.262	0.00	5.26	0.00	0.00	0.00	5.26	0.00	10.53	0.00	0.00	0.00	0.00	0.00
5.267	0.00	0.00	0.00	0.00	0.00	4.17	0.00	0.00	0.00	4.17	0.00	0.00	0.00
5.271	0.00	0.00	0.00	0.00	16.67	0.00	0.00	8.33	0.00	0.00	0.00	8.33	0.00
5.275	0.00	0.00	0.00	0.00	0.00	0.00	0.00	0.00	0.00	2.22	0.00	0.00	8.89
5.282	0.00	0.00	0.00	0.00	0.00	4.17	0.00	16.67	0.00	0.00	0.00	4.17	4.17
5.285	0.00	0.00	0.00	0.00	0.00	0.00	0.00	4.55	0.00	0.00	0.00	4.55	4.55
5.287	0.00	2.44	0.00	0.00	0.00	0.00	0.00	19.51	0.00	0.00	0.00	9.76	7.32
5.289	0.00	0.00	0.00	0.00	0.00	5.71	0.00	2.86	0.00	0.00	2.86	31.43	5.71
5.294	0.00	0.00	0.00	0.00	0.00	12.00	0.00	0.00	0.00	0.00	0.00	8.00	4.00
5.298	0.00	2.27	0.00	0.00	0.00	25.00	0.00	0.00	0.00	0.00	0.00	6.82	4.55
5.300	0.00	0.00	0.00	0.00	0.00	18.75	6.25	0.00	0.00	0.00	0.00	12.50	0.00
5.311	0.00	0.00	0.00	0.00	0.00	0.00	2.50	5.00	0.00	0.00	5.00	0.00	0.00
5.313	0.00	0.00	0.00	0.00	0.00	5.71	0.00	20.00	0.00	2.86	0.00	2.86	2.86
5.316	0.00	0.00	0.00	0.00	0.00	0.00	4.35	0.00	0.00	4.35	0.00	8.70	0.00
5.318	0.00	0.00	0.00	0.00	0.00	0.00	0.00	7.32	0.00	2.44	0.00	7.32	2.44
5.322	0.00	6.25	0.00	0.00	0.00	0.00	0.00	10.42	0.00	0.00	0.00	20.83	2.08
5.327	0.00	1.08	0.00	0.00	8.60	1.08	1.08	4.30	1.08	0.00	1.08	2.15	3.23
5.331	0.00	0.00	0.00	0.00	0.00	0.00	0.00	3.70	0.00	0.00	0.00	14.81	0.00
5.334	0.00	0.00	0.00	0.00	0.00	0.00	4.76	0.00	0.00	0.00	0.00	14.29	0.00
5.336	0.00	0.00	0.00	0.00	0.00	0.00	0.00	0.00	0.00	3.92	7.84	15.69	3.92
5.338	0.00	0.00	0.00	0.00	0.00	0.00	10.00	0.00	0.00	0.00	0.00	15.00	0.00
5.339	0.00	0.00	0.00	0.00	0.00	0.00	0.00	5.00	0.00	0.00	0.00	5.00	0.00
5.340	0.00	0.00	0.00	0.00	0.00	0.00	8.33	4.17	0.00	0.00	0.00	4.17	8.33
5.367	0.00	0.00	0.00	0.00	0.00	0.00	7.69	0.00	0.00	0.00	0.00	15.38	15.38
5.421	0.00	0.00	0.00	0.00	0.00	0.00	14.29	4.76	0.00	0.00	0.00	0.00	0.00
5.444	0.00	0.00	0.00	0.00	0.00	0.00	5.00	20.00	0.00	0.00	0.00	5.00	5.00
5.477	0.00	0.00	0.00	0.00	0.00	0.00	0.00	1.85	0.00	0.00	0.00	0.00	3.70
5.612	0.00	0.00	0.00	0.00	8.70	0.00	4.35	13.04	0.00	0.00	0.00	0.00	0.00
5.618	0.00	0.00	0.00	0.00	0.00	0.00	0.00	0.00	0.00	0.00	0.00	0.00	0.00
5.622	0.00	0.00	0.00	0.00	0.00	0.00	11.11	0.00	0.00	0.00	0.00	0.00	0.00
5.626	0.00	0.00	0.00	0.00	0.00	0.00	15.38	0.00	7.69	0.00	0.00	0.00	0.00
5.634	0.00	0.00	0.00	0.00	5.88	0.00	17.65	23.53	0.00	0.00	0.00	5.88	0.00
5.638	0.00	0.00	0.00	0.00	0.00	0.00	25.00	0.00	0.00	0.00	0.00	0.00	0.00
5.642	0.00	0.00	3.85	0.00	0.00	0.00	3.85	0.00	0.00	0.00	0.00	0.00	0.00
5.650	0.00	0.00	0.00	0.00	0.00	0.00	10.00	0.00	0.00	0.00	0.00	2.00	0.00
5.654	0.00	0.00	0.00	0.00	0.00	0.00	0.00	0.00	0.00	7.32	0.00	2.44	0.00
5.658	0.00	0.00	6.25	0.00	0.00	0.00	6.25	0.00	0.00	6.25	0.00	12.50	0.00
5.662	0.00	0.00	0.00	0.00	0.00	0.00	0.00	0.00	0.00	0.00	0.00	0.00	0.00
5.663	0.00	0.00	0.00	0.00	0.00	0.00	0.00	0.00	0.00	0.00	0.00	0.00	0.00
5.664	0.00	0.00	0.00	0.00	0.00	0.00	8.33	20.83	4.17	0.00	0.00	0.00	0.00
5.668	0.00	0.00	0.00	0.00	0.00	0.00	0.00	17.65	11.76	5.88	0.00	0.00	0.00
5.672	0.00	0.00	0.00	0.00	0.00	0.00	0.00	0.00	0.00	0.00	0.00	0.00	0.00
5.715	0.00	0.00	0.00	0.00	0.00	0.00	0.00	0.00	0.00	0.00	0.00	0.00	0.00
5.727	0.00	0.00	0.00	0.00	5.26	0.00	5.26	0.00	15.79	0.00	0.00	0.00	0.00
5.731	0.00	0.00	0.00	0.00	0.00	0.00	0.00	0.00	0.00	0.00	0.00	0.00	0.00
5.735	0.00	0.00	0.00	0.00	0.00	0.00	0.00	0.00	0.00	0.00	0.00	0.00	0.00
5.739	0.00	0.00	0.00	0.00	4.55	0.00	0.00	0.00	0.00	0.00	0.00	0.00	0.00
5.747	0.00	0.00	0.00	0.00	0.00	9.09	0.00	27.27	0.00	0.00	0.00	0.00	0.00
5.751	0.00	0.00	0.00	0.00	0.00	0.00	0.00	7.69	0.00	0.00	0.00	7.69	0.00
5.755	0.00	0.00	0.00	0.00	0.00	20.00	0.00	0.00	0.00	0.00	0.00	0.00	0.00
5.759	0.00	0.00	0.00	0.00	0.00	11.11	0.00	22.22	0.00	0.00	0.00	0.00	0.00
5.766	0.00	0.00	0.00	0.00	0.00	0.00	0.00	0.00	0.00	0.00	0.00	0.00	0.00
5.770	0.00	0.00	0.00	0.00	0.00	6.25	0.00	0.00	0.00	0.00	0.00	0.00	0.00
5.774	0.00	0.00	0.00	0.00	0.00	0.00	0.00	0.00	0.00	0.00	5.71	2.86	0.00
5.778	0.00	0.00	0.00	0.00	0.00	0.00	0.00	0.00	0.00	0.00	16.67	0.00	0.00
5.781	0.00	0.00	0.00	0.00	0.00	5.26	0.00	5.26	0.00	0.00	10.53	0.00	0.00
5.817	0.00	0.00	0.00	0.00	0.00	0.00	0.00	9.09	0.00	0.00	0.00	18.18	0.00
5.821	0.00	0.00	0.00	0.00	0.00	0.00	0.00	0.00	0.00	0.00	0.00	0.00	12.50
5.825	0.00	0.00	0.00	0.00	0.00	0.93	0.00	5.56	0.00	0.00	0.00	18.52	5.56
5.829	0.00	0.00	0.00	0.00	3.33	0.00	0.00	13.33	10.00	0.00	0.00	6.67	10.00
5.833	0.00	0.00	0.00	0.00	0.00	0.00	0.00	0.00	14.29	0.00	0.00	0.00	0.00
5.837	0.00	0.00	0.00	0.00	1.56	0.00	0.78	1.56	0.00	0.00	0.00	25.78	28.13
5.841	0.00	0.00	0.00	0.00	2.50	0.00	7.50	0.00	5.00	0.00	0.00	12.50	20.00
5.845	0.00	0.00	0.00	0.00	0.00	4.76	9.52	0.00	4.76	0.00	0.00	0.00	0.00
5.853	0.00	0.00	0.00	0.00	0.00	0.00	0.00	6.45	0.00	0.00	0.00	0.00	0.00
5.856	0.00	0.00	0.00	0.00	0.00	0.00	10.34	3.45	0.00	0.00	0.00	0.00	0.00
5.868	0.00	0.00	0.00	0.00	0.00	0.00	0.00	0.00	0.00	0.00	0.00	16.67	0.00
5.872	0.00	0.00	0.00	0.00	0.00	0.00	0.00	11.11	0.00	0.00	0.00	0.00	0.00
5.876	0.00	0.00	0.00	0.00	0.00	0.00	0.00	5.26	0.00	0.00	0.00	0.00	0.00
5.879	0.00	0.00	0.00	0.00	0.00	0.00	4.35	0.00	0.00	0.00	0.00	0.00	0.00
5.935	0.00	0.00	3.85	0.00	0.00	0.00	7.69	0.00	0.00	0.00	0.00	0.00	7.69
5.944	0.00	0.00	0.00	0.00	0.00	0.00	8.70	39.13	0.00	0.00	0.00	0.00	0.00
5.951	0.00	0.00	0.00	0.00	0.00	0.00	23.53	0.00	5.88	0.00	2.94	0.00	0.00
5.958	0.00	0.00	0.00	0.00	0.00	0.00	12.82	7.69	1.28	0.00	0.00	0.00	0.00
5.972	0.00	0.00	0.00	0.00	0.00	0.00	8.96	0.00	0.00	0.00	0.00	1.49	1.49
5.978	0.00	2.78	0.00	0.00	0.00	0.00	0.00	0.00	0.00	0.00	0.00	0.00	0.00
6.024	0.00	0.00	0.00	0.00	0.00	0.00	0.00	6.25	0.00	0.00	0.00	0.00	0.00
6.031	0.00	0.00	0.00	0.00	5.26	0.00	0.00	10.53	0.00	0.00	5.26	0.00	0.00
6.037	0.00	0.00	0.00	0.00	0.00	0.00	0.00	0.00	0.00	0.00	4.35	0.00	0.00
6.114	0.00	0.00	0.00	0.00	0.00	0.00	0.00	4.17	4.17	0.00	0.00	0.00	0.00
6.121	0.00	0.00	0.00	0.00	0.00	0.00	0.00	7.14	0.00	0.00	0.00	0.00	0.00
6.128	0.00	0.00	0.00	0.00	8.20	0.00	0.00	0.00	1.64	0.00	1.64	3.28	0.00
6.142	0.00	0.00	0.00	0.00	6.25	0.00	0.00	0.00	12.50	0.00	6.25	0.00	0.00
6.203	0.00	2.63	0.00	0.00	2.63	0.00	0.00	5.26	0.00	0.00	0.00	5.26	2.63
6.217	0.00	0.00	0.00	0.00	0.00	3.13	0.00	12.50	0.00	3.13	0.00	0.00	0.00
6.224	0.00	8.70	0.00	0.00	0.00	0.00	0.00	0.00	0.00	0.00	0.00	0.00	0.00
6.234	0.00	0.00	0.00	0.00	0.00	0.00	0.00	3.85	3.85	0.00	3.85	0.00	0.00
6.248	0.00	0.00	0.00	0.00	0.00	0.00	0.00	0.00	0.00	0.00	0.00	0.00	0.00
6.293	0.00	0.00	0.00	0.00	0.00	0.00	0.00	8.33	8.33	0.00	0.00	0.00	0.00
6.300	0.00	0.00	0.00	0.00	0.00	3.85	3.85	11.54	11.54	0.00	0.00	0.00	3.85
6.306	0.00	0.00	0.00	0.00	0.00	0.00	0.00	10.00	0.00	0.00	0.00	0.00	0.00
6.313	0.00	0.00	0.00	0.00	0.00	0.00	0.00	0.00	0.00	0.00	0.00	5.88	0.00
6.320	0.00	0.00	0.00	0.00	0.00	0.00	0.00	24.44	2.22	0.00	2.22	0.00	0.00
6.327	0.00	0.00	0.00	0.00	4.00	0.00	0.00	12.00	0.00	0.00	0.00	0.00	0.00
6.334	0.00	1.41	0.00	0.00	0.00	0.00	0.00	0.00	0.00	0.00	0.00	2.82	0.00
6.341	0.00	0.00	0.00	0.00	0.00	0.00	0.00	0.00	0.00	0.00	0.00	0.00	0.00
6.348	0.00	0.00	0.00	0.00	0.00	0.00	0.00	3.57	0.00	0.00	7.14	0.00	25.00
6.355	0.00	0.00	0.00	0.00	0.00	0.00	0.00	0.00	0.00	0.00	0.00	0.00	24.14
6.369	0.00	0.00	0.00	0.00	0.00	0.00	0.00	11.11	0.00	0.00	0.00	0.00	22.22
6.377	0.00	0.00	0.00	0.00	3.13	0.00	0.00	25.00	0.00	0.00	3.13	0.00	9.38
6.382	0.00	0.00	0.00	0.00	0.00	0.00	0.00	7.69	0.00	0.00	0.00	0.00	0.00
6.394	0.00	0.00	0.00	0.00	4.55	0.00	4.55	4.55	0.00	0.00	0.00	0.00	0.00
6.401	0.00	0.00	0.00	0.00	0.00	0.00	3.85	3.85	0.00	0.00	0.00	0.00	0.00
6.408	0.00	0.00	0.00	0.00	0.00	0.00	0.00	3.23	0.00	0.00	12.90	0.00	0.00
6.415	0.00	0.00	0.00	2.94	0.00	0.00	0.00	2.94	0.00	0.00	0.00	0.00	0.00
6.422	0.00	0.00	0.00	0.00	0.00	0.00	0.00	0.00	0.00	0.00	0.00	0.00	0.00
6.429	0.00	0.00	0.00	0.00	0.00	0.00	0.00	10.26	0.00	0.00	0.00	2.56	0.00
6.438	0.00	5.26	0.00	0.00	0.00	0.00	0.00	7.89	0.00	0.00	0.00	7.89	2.63
6.471	0.00	0.00	0.00	0.00	0.00	0.00	0.00	7.69	0.00	0.00	0.00	7.69	0.00
6.478	0.00	9.09	0.00	0.00	0.00	0.00	0.00	2.27	0.00	0.00	0.00	0.00	0.00
6.485	0.00	0.00	0.00	0.00	0.00	0.00	0.00	2.17	0.00	0.00	0.00	0.00	0.00
6.492	0.00	1.92	0.00	0.00	0.00	0.00	0.00	3.85	0.00	0.00	0.00	0.00	0.00
6.499	0.00	0.00	0.00	0.00	0.00	0.00	0.00	0.00	0.00	0.00	3.23	0.00	0.00
6.506	0.00	0.00	0.00	0.00	0.00	0.00	0.00	5.56	0.00	2.78	2.78	0.00	0.00
6.513	0.00	11.90	0.00	0.00	0.00	0.00	0.00	0.00	0.00	0.00	0.00	2.38	0.00
6.520	0.00	2.00	0.00	0.00	0.00	0.00	0.00	0.00	2.00	0.00	0.00	0.00	0.00
6.534	0.00	0.00	0.00	0.00	0.00	0.00	0.00	10.53	0.00	2.63	0.00	0.00	2.63
6.548	0.00	10.81	0.00	0.00	0.00	0.00	0.00	5.41	0.00	10.81	0.00	0.00	0.00
6.557	0.00	0.00	0.00	0.00	5.56	0.00	0.00	16.67	0.00	0.00	16.67	0.00	11.11
